# Supplementary material for: Ultrasensitive fluorometric determination of aluminum using the CoFe2O4 NPs/SDS/oxine system with the aid of ultrasound waves
Source: Royal Society of Chemistry journal article supplement (doi:10.1039/d3ay02288a), 2024-01-01
Supplement: d3ay02288a1.pdf [file d3ay02288a1.pdf]

## **Electronic Supplementary Material**

### **Ultrasensitive fluorometric determination of aluminum using CoFe<sub>2</sub>O<sub>4</sub> NPs/SDS/oxine system with the aid of ultrasound waves**

**Yahya S. Alqahtani<sup>a</sup>, Ashraf M. Mahmoud<sup>a</sup>, Mohamed M. El-Wekil<sup>\*b</sup>**

<sup>a</sup> Department of Pharmaceutical Chemistry, College of Pharmacy, Najran University, Najran,  
Saudi Arabia

<sup>b</sup> Department of Pharmaceutical Analytical Chemistry, Faculty of Pharmacy, Assiut University,  
Assiut, Egypt.

\*mohamed.elwakeel@pharm.aun.edu.eg, mohamed.mohamoud@ymail.com (corresponding  
author)

## Instrumentation

The morphology assessment of  $\text{CoFe}_2\text{O}_4$  NPs and oxine/SDS@ $\text{CoFe}_2\text{O}_4$  NPs was conducted through transmission electron microscopy (TEM) using the JEOL JSM-7600 F instrument. Scanning electron microscopy (SEM) was employed, utilizing the JEOL JSM-5400 LV instrument in Oxford, USA. Elemental micro-analysis was carried out using the EDX technique with the OXFORD Aztec instrument in the USA. The spectrofluorometer RF-5301 PC from Shimadzu, Tokyo, Japan, was employed for the study, with the excitation and emission slit control configured at a slit width of 5 nm, utilizing a 1 cm quartz cell. Fourier-transform infrared (FT-IR) spectra in the range of  $400\text{--}4000\text{ cm}^{-1}$  were recorded using the Nicolet™ iS™10 spectrometer. X-ray diffractometry (XRD) measurements were conducted using a Philips/1710, USA. Particle size distribution was determined through dynamic light scattering (DLS) techniques using the Zeta-sizer Nano ZS instrument from Malvern in the UK. Magnetic properties of the samples were carried out using Lakeshore vibrational sample magnetometer (VSM-7410). The  $\text{N}_2$  sorption experiment was carried out by Micromeritics ASAP 2020 analyzer. The sample was out gassed at  $150^\circ\text{C}$  for 12 h in a dynamic vacuum before physisorption measurements. The specific surface area was calculated using Brunauer-Emmet-Teller (BET) method.

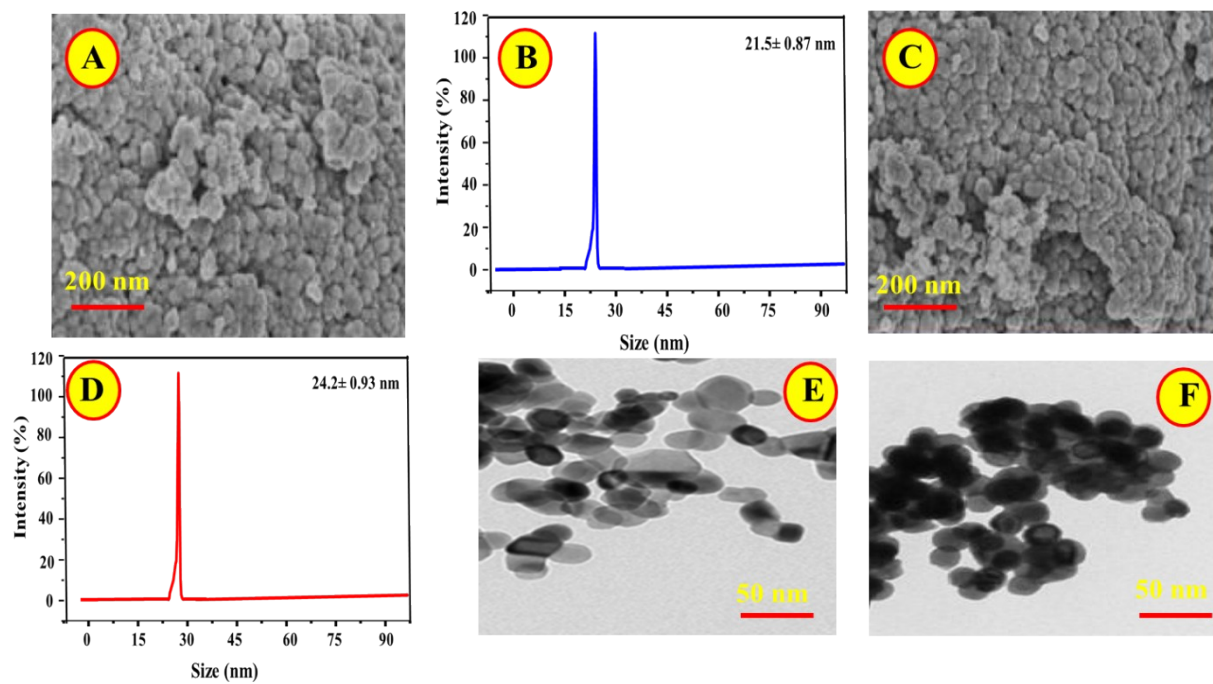

**Fig.S1** SEM image (A) and DLS (B) of CoFe<sub>2</sub>O<sub>4</sub> NPs while (C) and (D) are SEM image and DLS of oxine/SDS@CoFe<sub>2</sub>O<sub>4</sub> NPs, respectively. TEM images of CoFe<sub>2</sub>O<sub>4</sub> NPs and oxine/SDS@CoFe<sub>2</sub>O<sub>4</sub> NPs are presented in (E) and (F), respectively.

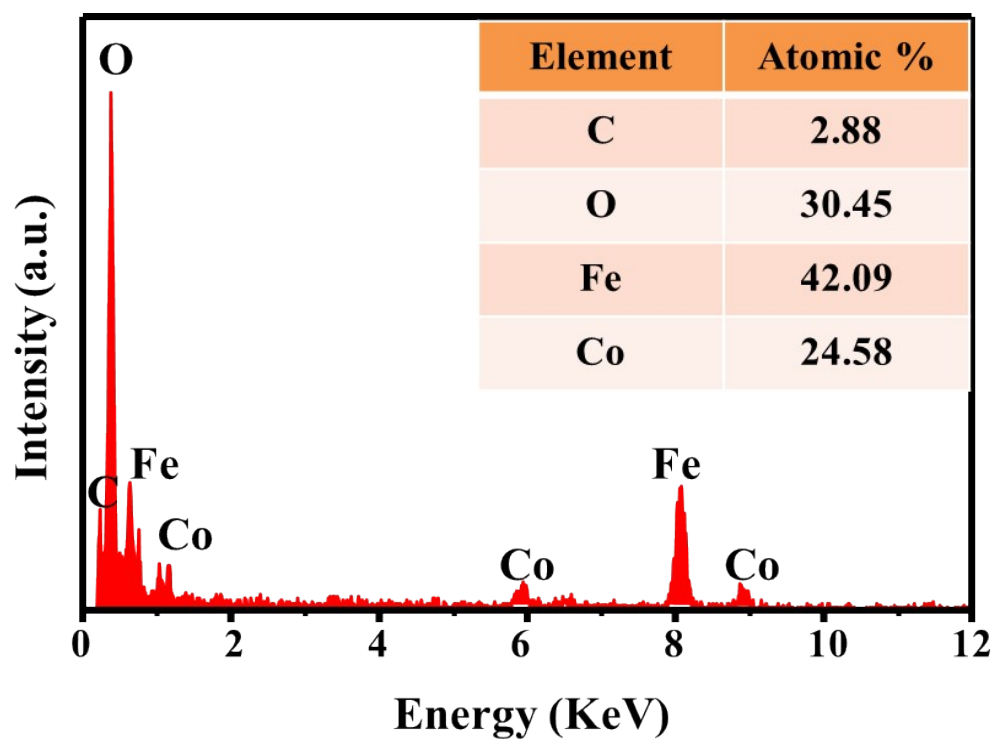

Fig.S2 EDX pattern of oxine/SDS@CoFe<sub>2</sub>O<sub>4</sub> NPs.

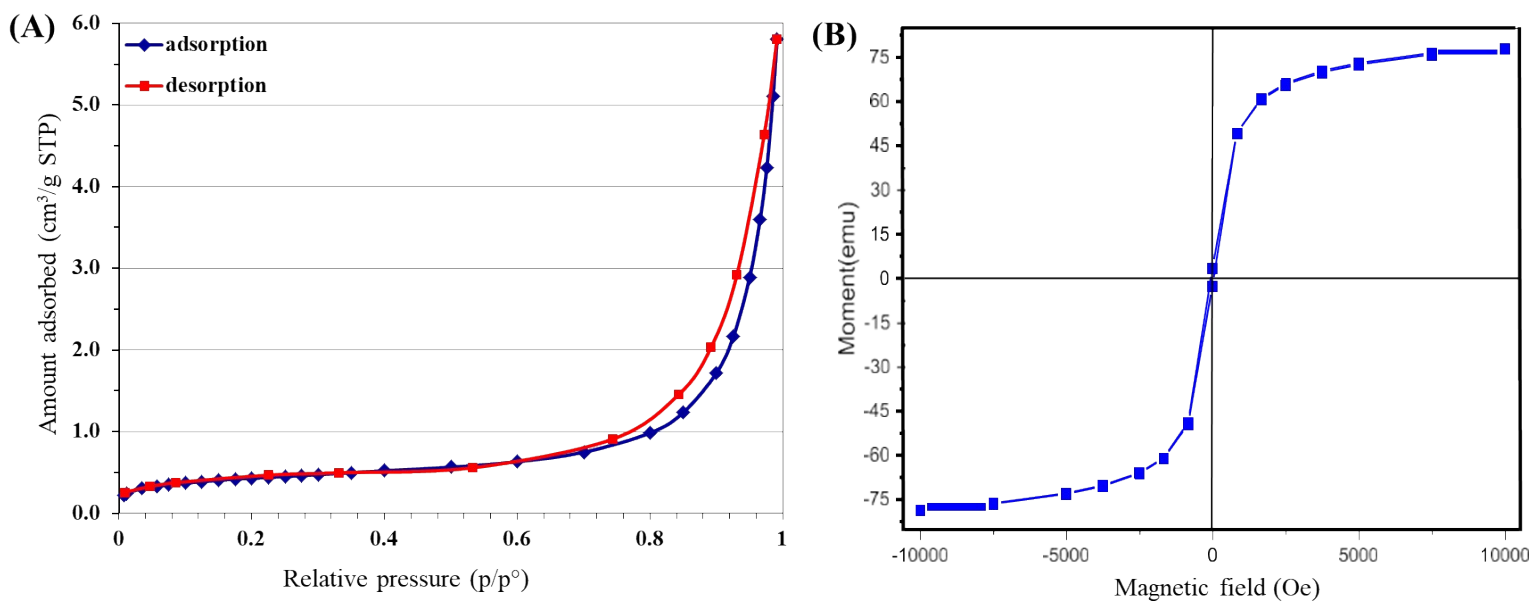

**Fig.S3** BET analysis (A) and vibrating sample magnetometer (B) for oxine/SDS@CoFe<sub>2</sub>O<sub>4</sub> NPs.

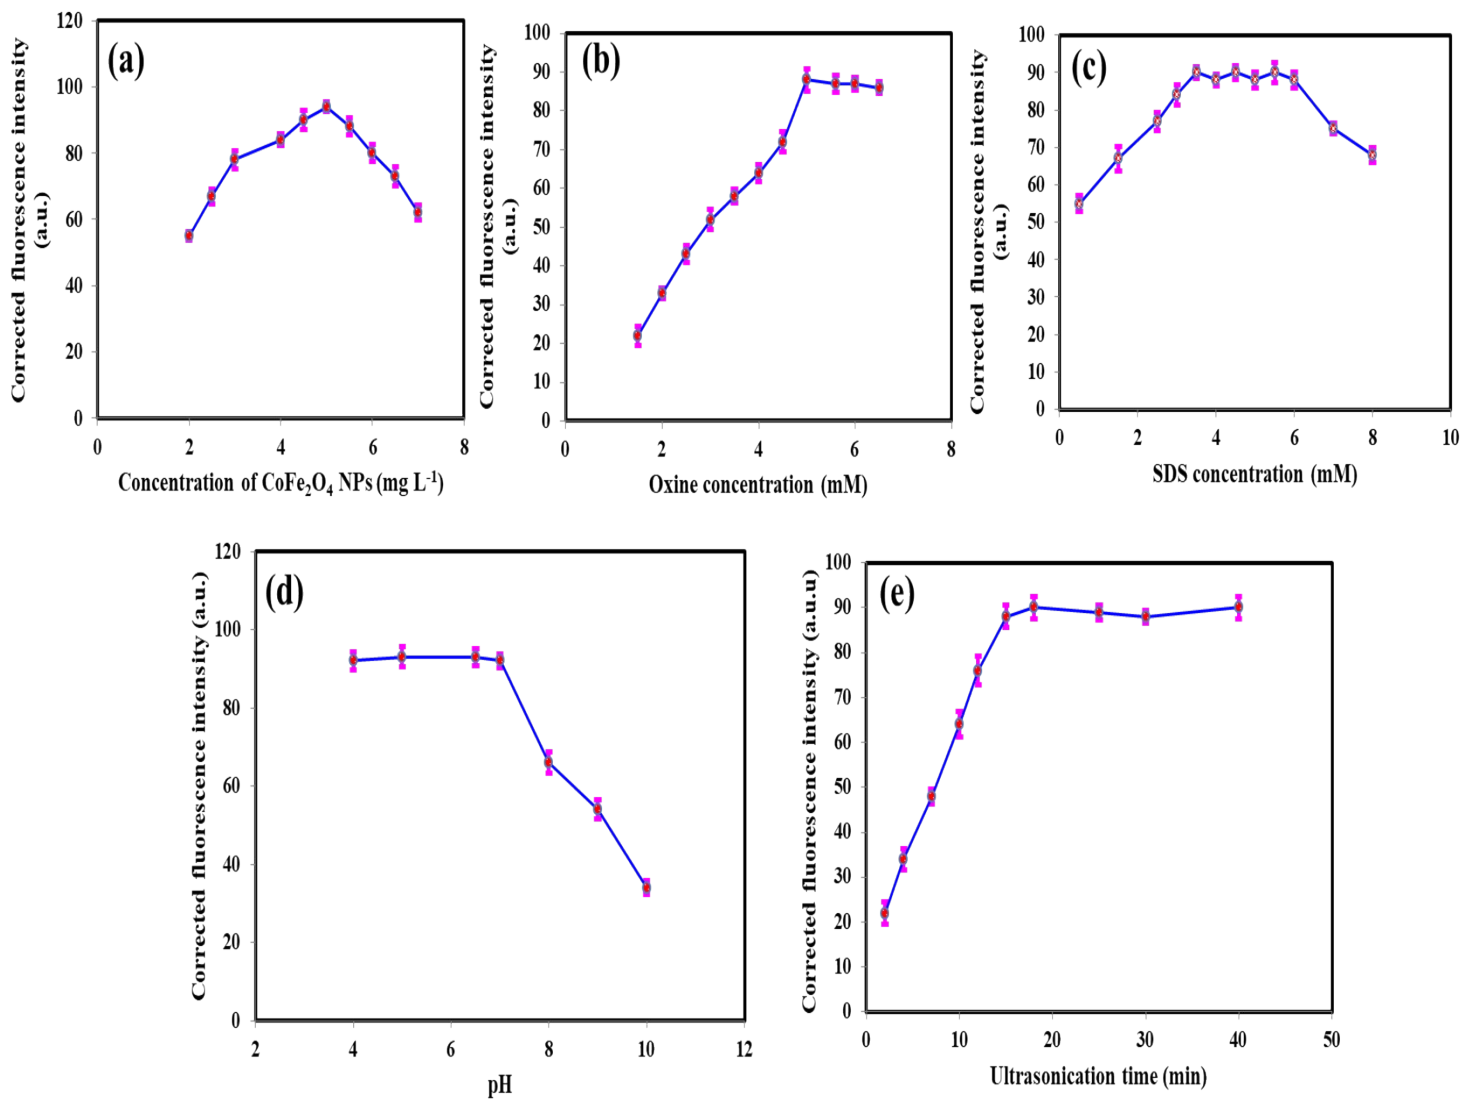

**Fig.S4** The effect of CoFe<sub>2</sub>O<sub>4</sub> NPs concentration (a), oxine concentration (b), SDS concentration (c), pH (d), and ultrasonication time (e) during the preparation of oxine/SDS@CoFe<sub>2</sub>O<sub>4</sub> NPs. Concentration of Al<sup>3+</sup> is 70 ng mL<sup>-1</sup>.

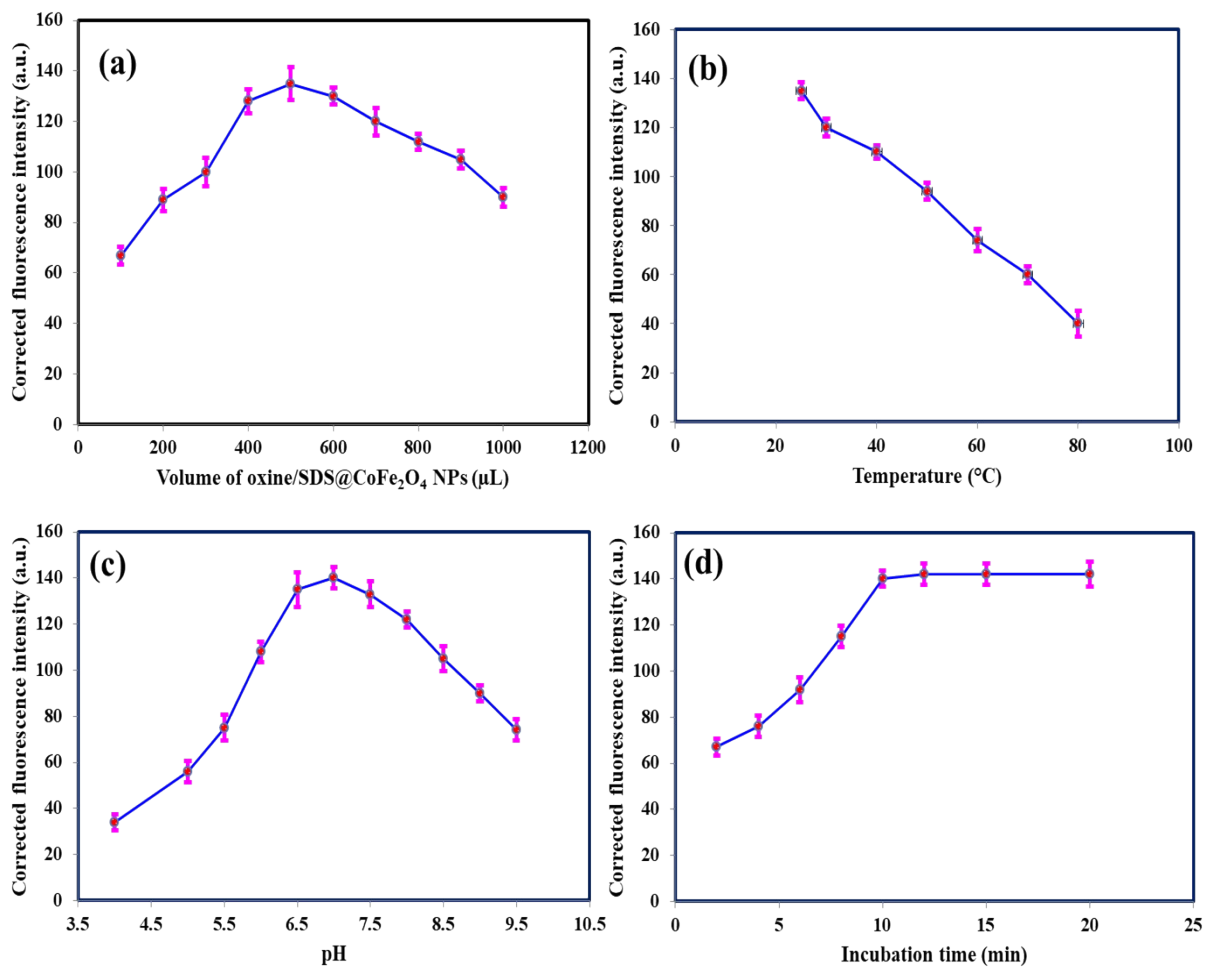

**Fig.S5** The effect of oxine/SDS/CoFe<sub>2</sub>O<sub>4</sub> NPs volume (a), temperature (b), pH (c), and incubation time (d). Concentration of Al<sup>3+</sup> is 100 ng mL<sup>-1</sup>.

**Table S1** Tolerance ratios of interfering species in determination of 100 ng mL<sup>-1</sup> Al<sup>3+</sup>.

| Interfering species                                                                                                                      | Tolerance ratio |               |
|------------------------------------------------------------------------------------------------------------------------------------------|-----------------|---------------|
|                                                                                                                                          | Before masking  | After masking |
| Ascorbic acid, dopamine, methionine                                                                                                      | 5000            | 5000          |
| Adenine, guanine, cysteine                                                                                                               | 2200            | 2200          |
| Na <sup>+</sup> , K <sup>+</sup> , Cl <sup>-</sup> , SO <sub>4</sub> <sup>2-</sup> , CH <sub>3</sub> COO <sup>-</sup> , Ba <sup>2+</sup> | 1800            | 1800          |
| Oxalic acid, citric acid,                                                                                                                | 1600            | 1600          |
| Pb <sup>2+</sup> , EDTA, Mg <sup>2+</sup>                                                                                                | 700             | 700           |
| Zn <sup>2+</sup>                                                                                                                         | 100             | 1200          |
| Fe <sup>2+</sup> , Fe <sup>3+</sup>                                                                                                      | 100             | 1200          |
| Cr <sup>3+</sup>                                                                                                                         | 50              | 1000          |
| MnO <sub>4</sub> <sup>-</sup> , Cu <sup>2+</sup> , Cd <sup>2+</sup>                                                                      | 400             | 400           |
| F <sup>-</sup>                                                                                                                           | 15              | 500           |
